# Supplementary material for: Fabrication, Characterization, and Properties of Poly (Ethylene-Co-Vinyl Acetate) Composite Thin Films Doped with Piezoelectric Nanofillers
Source: Nanomaterials (Basel). 2019 Aug 20;9(8):1182. doi: 10.3390/nano9081182 (PMC6724128; doi:10.3390/nano9081182)
Supplement: Supplementary file 1 [file nanomaterials-09-01182-s001.pdf]

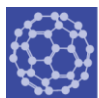

# Supplementary material

## **Fabrication, Characterization, and Properties of Poly (Ethylene-Co-Vinyl Acetate) Composite Thin Films Doped with Piezoelectric Nanofillers**

**Giulia Mariotti and Lorenzo Vannozzi \***

The BioRobotics Institute, Scuola Superiore Sant'Anna, Pontedera (PI) 56025, Italy

\* Correspondence: [lorenzo.vannozzi@santannapisa.it](mailto:lorenzo.vannozzi@santannapisa.it); Tel.: +39-050-883091

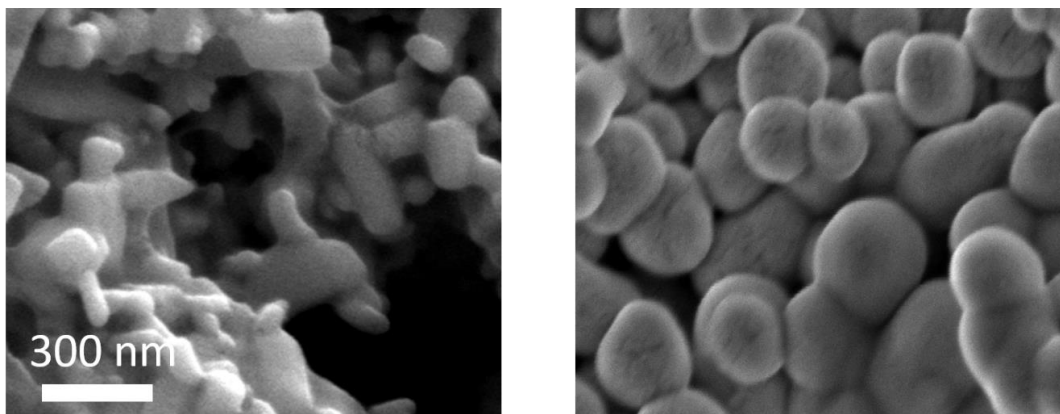

**Figure S1.** Dual Beam imaging of zinc oxide nanopowder (left) and barium titanate nanoparticles (right).

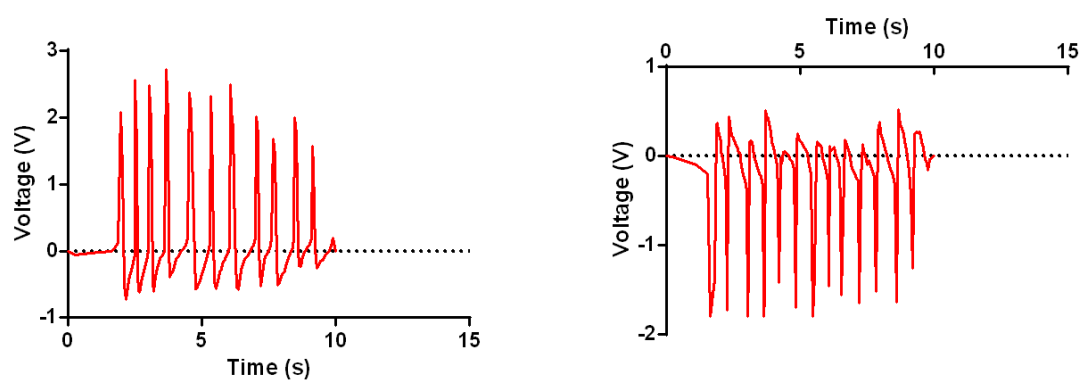

**Figure S2.** Voltage output in standard (left) and inverted (right) poles configuration.
